# Supplementary material
Source: publisher figshare collection journal article supplement (https://springernature.figshare.com/ndownloader/files/12443369)
Supplement: Supplementary file 1 [file 12443369]

## Sheet: sheet1
Class	case = patients that die within 1.5 years, controls = patients that survive with at least 5 years follow up, other = not meeting either criterion
Age	age in days
Stage	INSS disease stage
MYCN	1 = MYCN-amplified, 0 = non-MYCN amplified
OStime	overall survival time in days
OS	overall survival, 1 = death from any cause, 0 = censored
EFStime	event-free survival time in days
EFS	event-free survival, 1 = disease progression/relapse/death, 0 = censored
Platform	array platform including resolution. Note: the Agilent custom design used for a subset of samples is enriched for regions important in neuroblastoma (see Kumps et al., 2013, PLoS ONE).
Cohort	treatment cohort, 1 = SIOPEN, 2 = GPOH, 3 = COG, 4 = Japan
Numerical	1 = only whole chromosome aberrations, 0 = segmental aberrations present (can include whole chromosome aberrations)
1p loss, …	1 = aberration present, 0 = not present. Calculation: aberrations larger than 3 Mb and reaching the platform-specific cutoffs for gains and losses were taken into account, whole chromosome aberrations and amplicons are excluded, in case of aberration spanning centromere, is considered as p if part on p is longer and vice versa
	NOTE: this is a computational scoring to get a general image of abundance of aberrations, not aiming to establish a complete genomic profile for individual patients, nor to identify subclonal events (as these would not reach the defined cutoffs)
Number	Class	Age	Stage	MYCN	OStime	OS	EFStime	EFS	Platform	Cohort	Numerical	1p loss	3p loss	4p loss	11q loss	14q loss	1q gain	2p gain	17q gain
1	control	551	4	0	6369	0	6369	0	Affymetrix Cytoscan HD 2.6M (SNP)	1	1	0	0	0	0	0	0	0	0
2	case	3477	4	0	470	1	NA	NA	Affymetrix Cytoscan HD 2.6M (SNP)	1	0	0	0	1	1	0	0	0	1
3	control	1079	4	0	3680	0	2680	0	Affymetrix Cytoscan HD 2.6M (SNP)	1	0	0	1	1	1	0	0	1	1
4	case	470	4	1	203	1	NA	NA	Affymetrix Cytoscan HD 2.6M (SNP)	1	0	0	0	0	0	0	0	0	1
5	control	1435	4	1	5354	0	5354	0	Affymetrix Cytoscan HD 2.6M (SNP)	1	0	1	0	0	0	0	1	0	1
6	control	517	4	1	6209	0	6209	0	Affymetrix Cytoscan HD 2.6M (SNP)	1	0	1	0	0	0	0	0	0	1
7	control	463	4	0	4433	0	4433	0	Affymetrix Cytoscan HD 2.6M (SNP)	1	0	0	0	0	1	0	0	0	1
8	control	596	4	1	3679	0	3679	0	Affymetrix Cytoscan HD 2.6M (SNP)	1	0	1	0	0	0	1	0	0	1
9	case	827	4	0	544	1	NA	NA	Affymetrix Cytoscan HD 2.6M (SNP)	1	0	0	0	0	0	0	1	0	0
10	control	793	2b	1	3186	0	3186	0	Affymetrix Cytoscan HD 2.6M (SNP)	1	0	1	0	0	0	0	0	0	1
11	case	1673	4	0	531	1	NA	NA	Affymetrix Cytoscan HD 2.6M (SNP)	1	0	0	0	0	0	0	0	0	1
12	case	435	3	1	58	1	58	1	Affymetrix Cytoscan HD 2.6M (SNP)	1	0	1	0	0	0	0	0	0	1
13	case	2158	4	0	173	1	173	1	Affymetrix Cytoscan HD 2.6M (SNP)	1	0	0	1	1	1	0	0	0	1
14	control	NA	4	1	NA	NA	NA	NA	Affymetrix Cytoscan HD 2.6M (SNP)	1	0	1	0	0	0	0	0	0	1
15	case	483	4	0	160	1	160	1	Affymetrix Cytoscan HD 2.6M (SNP)	1	0	1	0	0	0	0	0	0	0
16	case	1043	4	0	540	1	NA	NA	Affymetrix Cytoscan HD 2.6M (SNP)	1	0	1	1	0	1	0	0	0	1
17	control	700	3	1	3559	0	3559	0	Illumina HumanCytoSNP-12 300k (SNP)	1	0	1	0	0	0	0	0	0	0
18	control	1156	4	0	3528	0	3528	0	Illumina HumanCytoSNP-12 300k (SNP)	1	1	0	0	0	0	0	0	0	0
19	control	1338	3	1	3072	0	3072	0	Illumina HumanCytoSNP-12 300k (SNP)	1	0	0	0	0	0	0	0	0	0
20	case	1886	4	0	274	1	274	1	Illumina HumanCytoSNP-12 300k (SNP)	1	0	0	0	0	1	1	1	0	1
21	control	456	4	1	1977	0	1977	0	Illumina HumanCytoSNP-12 300k (SNP)	1	0	0	0	0	0	0	0	0	0
22	control	548	4	1	3985	0	3985	0	Illumina HumanCytoSNP-12 300k (SNP)	1	0	0	0	0	0	0	1	0	0
23	control	1095	4	1	3224	0	3224	0	Illumina HumanCytoSNP-12 300k (SNP)	1	0	0	0	0	0	0	0	1	0
24	case	639	4	1	274	1	213	1	Illumina HumanCytoSNP-12 300k (SNP)	1	0	0	0	0	0	0	0	0	0
25	control	664	4	1	2955	0	2955	0	Agilent Human Genome CGH 180k (aCGH)	1	0	1	1	0	0	0	1	1	1
26	control	675	4	1	2381	0	2381	0	Agilent Human Genome CGH 180k (aCGH)	1	0	1	0	0	0	0	0	0	1
27	control	1393	4	0	3168	0	3168	0	Agilent Human Genome CGH 180k (aCGH)	1	0	0	1	1	1	0	0	1	1
28	other	1424	4	0	1051	0	1051	0	Agilent Human Genome CGH 180k (aCGH)	1	0	0	1	1	1	0	0	0	1
29	other	771	4	0	692	1	301	1	Agilent Human Genome CGH 180k (aCGH)	1	0	1	1	0	1	0	1	0	1
30	other	545	4	0	681	0	681	0	Agilent Human Genome CGH 180k (aCGH)	1	1	0	0	0	0	0	0	0	0
31	other	754	4	0	834	0	237	1	Agilent Human Genome CGH 180k (aCGH)	1	0	0	1	1	1	0	0	1	1
32	other	914	4	1	1100	1	1043	1	Agilent Human Genome CGH 180k (aCGH)	1	0	1	0	0	0	0	0	0	1
33	case	3006	4	1	222	1	222	1	Agilent Human Genome CGH 180k (aCGH)	1	0	1	0	0	0	0	1	1	1
34	other	1994	4	0	575	0	575	0	Agilent Human Genome CGH 180k (aCGH)	1	0	0	1	1	1	0	1	1	1
35	control	960	4	0	2014	0	2014	0	Agilent Human Genome CGH 180k (aCGH)	1	0	0	0	0	1	1	1	1	1
36	case	2626	4	0	447	1	NA	1	Agilent Human Genome CGH 180k (aCGH)	1	0	0	0	0	0	0	1	1	1
37	control	1306	4	0	2254	0	2254	0	Agilent Human Genome CGH 180k (aCGH)	1	0	1	1	0	1	0	0	0	1
38	other	4407	4	0	466	0	466	0	Agilent Human Genome CGH 180k (aCGH)	1	0	0	0	0	1	0	0	0	0
39	control	1476	4	1	2291	0	2291	0	Agilent Human Genome CGH 180k (aCGH)	1	0	1	0	0	0	0	0	0	0
40	other	830	4	1	975	1	NA	1	Agilent Human Genome CGH 180k (aCGH)	1	0	1	0	1	0	0	0	0	1
41	case	1158	4	0	220	1	220	1	Agilent Human Genome CGH 180k (aCGH)	1	0	0	0	0	1	0	0	0	1
42	other	4001	4	0	314	0	314	0	Agilent Human Genome CGH 180k (aCGH)	1	0	0	1	0	1	0	1	0	1
43	other	1095	4	0	212	0	212	0	Agilent Human Genome CGH 180k (aCGH)	1	0	0	1	0	1	0	1	1	1
44	other	1876	2b	1	286	0	286	0	Agilent Human Genome CGH 180k (aCGH)	1	0	1	0	0	0	0	0	1	1
45	case	2335	4	0	208	1	77	1	NimbleGen CGH 72k (aCGH)	1	0	0	0	0	0	0	1	0	1
46	other	2094	4	0	1228	0	1228	0	NimbleGen CGH 72k (aCGH)	1	0	0	0	0	1	0	0	0	1
47	other	389	4	0	1455	0	1455	0	NimbleGen CGH 72k (aCGH)	1	0	0	0	0	0	0	1	0	1
48	other	1047	4	1	1090	0	1090	0	NimbleGen CGH 72k (aCGH)	1	0	1	0	0	0	0	0	0	1
49	other	1019	4	0	1186	1	507	1	NimbleGen CGH 72k (aCGH)	1	0	0	0	0	1	0	1	1	1
50	other	1212	4	0	1440	0	158	1	NimbleGen CGH 72k (aCGH)	1	0	0	0	1	1	0	0	0	1
51	other	248	4	1	1312	0	1312	0	NimbleGen CGH 72k (aCGH)	1	0	0	0	0	0	0	0	0	1
52	other	1040	4	0	974	0	974	0	NimbleGen CGH 72k (aCGH)	1	0	0	1	1	0	1	1	0	1
53	other	1456	4	1	762	1	581	1	NimbleGen CGH 72k (aCGH)	1	0	1	1	0	0	0	0	0	1
54	other	1837	4	0	890	0	890	0	NimbleGen CGH 72k (aCGH)	1	0	0	1	1	1	0	1	0	1
55	other	1467	4	0	1360	0	1355	1	NimbleGen CGH 72k (aCGH)	1	0	0	1	0	0	0	0	1	1
56	other	583	NA	1	1177	0	1177	0	NimbleGen CGH 72k (aCGH)	1	0	1	1	0	0	0	0	0	1
57	other	1120	4	0	1210	0	1210	0	NimbleGen CGH 72k (aCGH)	1	0	1	1	0	1	0	0	1	1
58	other	449	4	1	827	0	827	0	NimbleGen CGH 72k (aCGH)	1	0	1	0	0	0	0	0	0	1
59	other	941	4	1	1012	0	1012	0	NimbleGen CGH 72k (aCGH)	1	0	1	0	0	0	0	0	0	1
60	other	742	4	1	1271	0	1271	0	NimbleGen CGH 72k (aCGH)	1	0	1	0	0	0	0	0	0	0
61	other	554	3	1	887	0	887	0	NimbleGen CGH 72k (aCGH)	1	0	0	0	0	0	0	0	1	1
62	other	938	4	0	850	0	850	0	NimbleGen CGH 72k (aCGH)	1	0	0	1	1	1	0	1	1	1
63	other	993	4	1	694	0	694	0	NimbleGen CGH 72k (aCGH)	1	0	0	0	0	0	0	0	0	0
64	other	862	4	0	720	0	720	0	NimbleGen CGH 72k (aCGH)	1	0	0	0	0	1	0	0	0	0
65	other	1285	4	0	723	0	723	0	NimbleGen CGH 72k (aCGH)	1	0	0	0	0	1	0	0	0	1
66	control	570	4	0	2620	0	2620	0	NimbleGen CGH 72k (aCGH)	1	0	0	1	1	1	0	0	0	1
67	other	986	4	0	1077	0	1077	0	NimbleGen CGH 72k (aCGH)	1	0	0	0	0	0	0	0	0	1
68	case	396	4	1	133	1	95	1	NimbleGen CGH 72k (aCGH)	1	0	1	0	0	0	0	0	1	1
69	other	925	4	0	748	1	666	1	NimbleGen CGH 72k (aCGH)	1	0	1	0	0	1	0	1	0	1
70	other	764	NA	1	646	0	646	0	NimbleGen CGH 72k (aCGH)	1	0	1	0	0	0	0	0	0	1
71	other	1763	4	0	668	0	668	0	NimbleGen CGH 72k (aCGH)	1	0	0	0	0	1	0	0	0	1
72	other	1521	4	0	682	0	351	1	NimbleGen CGH 72k (aCGH)	1	0	0	1	0	1	0	0	1	1
73	case	506	NA	1	238	1	238	1	NimbleGen CGH 72k (aCGH)	1	0	1	0	0	0	0	0	1	1
74	other	3020	4	0	592	0	592	0	NimbleGen CGH 72k (aCGH)	1	0	0	0	0	0	0	0	0	0
75	other	403	4	1	1208	1	1208	1	NimbleGen CGH 72k (aCGH)	1	0	1	0	0	0	0	1	0	1
76	control	1064	4	1	2106	0	2106	0	NimbleGen CGH 72k (aCGH)	1	0	1	0	0	0	0	0	0	1
77	case	4537	4	1	503	1	319	1	NimbleGen CGH 72k (aCGH)	1	0	1	0	0	0	1	0	0	1
78	case	262	4	1	368	1	310	1	NimbleGen CGH 72k (aCGH)	1	0	1	0	0	1	0	0	1	1
79	other	2407	4	0	932	0	932	0	NimbleGen CGH 72k (aCGH)	1	0	0	1	1	1	0	1	0	1
80	other	950	4	1	1011	1	725	1	NimbleGen CGH 72k (aCGH)	1	0	1	0	0	0	0	1	1	1
81	other	2198	4	0	1919	0	1527	1	NimbleGen CGH 72k (aCGH)	1	0	0	1	1	1	0	1	1	1
82	case	276	4	1	159	1	73	1	NimbleGen CGH 72k (aCGH)	1	0	0	0	0	0	0	0	1	0
83	control	1567	3	1	1789	0	1722	1	NimbleGen CGH 72k (aCGH)	1	0	0	0	0	0	0	0	0	1
84	case	609	4	1	441	1	419	1	NimbleGen CGH 72k (aCGH)	1	0	0	0	0	0	0	0	0	0
85	other	1783	4	0	1573	0	1573	0	NimbleGen CGH 72k (aCGH)	1	0	0	0	0	1	1	1	1	1
86	other	454	4	0	1535	0	1535	0	NimbleGen CGH 72k (aCGH)	1	0	0	0	0	1	0	0	0	1
87	control	2841	4	1	1797	0	1797	0	NimbleGen CGH 72k (aCGH)	1	0	0	0	0	0	0	1	0	0
88	other	617	4	0	1174	1	813	1	NimbleGen CGH 72k (aCGH)	1	0	1	1	1	0	1	0	1	1
89	other	1682	4	0	1920	1	1887	1	NimbleGen CGH 72k (aCGH)	1	0	0	0	0	0	0	0	1	1
90	other	2477	4	0	1057	1	353	1	NimbleGen CGH 72k (aCGH)	1	0	0	1	0	1	0	0	0	1
91	control	374	4	1	1688	0	1688	0	NimbleGen CGH 72k (aCGH)	1	0	0	0	0	0	0	0	1	0
92	control	623	4	0	1670	0	1670	0	NimbleGen CGH 72k (aCGH)	1	0	0	1	0	1	0	0	1	1
93	other	729	4	0	1320	1	1320	1	NimbleGen CGH 72k (aCGH)	1	0	0	0	0	0	0	1	0	1
94	other	660	4	0	1302	0	839	1	NimbleGen CGH 72k (aCGH)	1	0	0	1	0	1	1	0	1	1
95	other	425	4	0	1583	0	1583	0	NimbleGen CGH 72k (aCGH)	1	1	0	0	0	0	0	0	0	0
96	case	689	4	1	448	1	349	1	NimbleGen CGH 72k (aCGH)	1	0	1	0	0	0	0	0	0	1
97	case	188	4	1	286	1	219	1	NimbleGen CGH 72k (aCGH)	1	0	1	0	0	0	0	0	0	1
98	other	1367	4	0	867	1	615	1	Agilent custom design 44k (aCGH)	1	0	0	0	0	1	0	1	0	0
99	case	312	4	1	228	1	148	1	Agilent custom design 44k (aCGH)	1	0	1	0	0	1	0	0	0	1
100	case	2787	4	1	484	1	438	1	Agilent custom design 44k (aCGH)	1	0	1	0	0	0	0	0	1	1
101	other	1062	4	0	547	0	433	1	Agilent custom design 60k (aCGH)	1	0	0	1	0	1	0	0	0	1
102	other	1227	4	1	1298	1	560	1	Agilent custom design 60k (aCGH)	1	0	0	0	0	1	0	0	1	1
103	other	1418	4	0	371	0	371	0	Agilent custom design 60k (aCGH)	1	0	0	0	1	1	0	0	0	1
104	other	730	4	0	730	1	730	1	Agilent custom design 44k (aCGH)	1	0	0	1	1	1	0	1	0	1
105	other	711	4	1	610	0	610	0	Agilent custom design 44k (aCGH)	1	0	1	0	0	0	0	0	1	1
106	other	1085	4	1	549	1	481	1	Agilent custom design 44k (aCGH)	1	0	1	0	0	0	0	0	0	1
107	case	584	4	1	517	1	130	1	Agilent custom design 44k (aCGH)	1	0	1	0	0	0	0	0	1	1
108	other	959	3	1	1583	0	1583	0	Agilent custom design 44k (aCGH)	1	0	1	1	0	0	1	0	0	1
109	other	2396	4	1	1247	1	898	1	Agilent custom design 44k (aCGH)	1	0	1	1	0	0	1	0	1	1
110	control	1174	4	0	2194	0	2194	0	Agilent custom design 44k (aCGH)	1	1	0	0	0	0	0	0	0	0
111	other	1640	4	0	1239	1	346	1	Agilent custom design 44k (aCGH)	1	0	0	0	1	1	1	1	0	1
112	control	485	4	1	1988	0	1988	0	Agilent custom design 44k (aCGH)	1	0	1	0	0	0	0	0	0	1
113	other	1995	4	0	680	0	680	0	Agilent custom design 44k (aCGH)	1	0	0	0	0	1	0	0	0	1
114	other	603	1	1	771	0	134	1	Agilent custom design 44k (aCGH)	1	0	1	0	0	0	0	0	0	1
115	case	3331	4	1	324	1	NA	1	Agilent custom design 44k (aCGH)	1	0	1	1	0	0	0	0	0	0
116	control	719	4	1	2422	0	2422	0	Agilent custom design 44k (aCGH)	1	0	1	0	0	0	0	0	1	1
117	other	895	4	1	1203	0	1203	0	Agilent custom design 44k (aCGH)	1	0	1	0	0	0	0	0	1	1
118	other	720	4	1	205	NA	NA	NA	Agilent custom design 44k (aCGH)	1	0	1	0	0	0	0	0	1	0
119	case	0	4	1	1	1	1	1	Agilent custom design 44k (aCGH)	1	0	0	0	0	0	0	0	0	1
120	control	816	4	1	2038	0	2038	0	Agilent custom design 44k (aCGH)	1	0	0	0	0	0	0	0	1	0
121	other	545	4	1	125	NA	NA	NA	Agilent custom design 44k (aCGH)	1	0	1	1	0	0	0	0	0	1
122	case	232	4	1	242	1	118	1	Agilent custom design 44k (aCGH)	1	0	1	0	0	0	0	0	0	1
123	other	2058	4	0	958	1	596	1	Agilent custom design 44k (aCGH)	1	0	0	1	1	1	0	0	0	1
124	other	689	3	1	874	0	874	0	Agilent custom design 44k (aCGH)	1	0	1	0	0	0	0	0	1	1
125	control	386	4	0	2550	0	2550	0	Agilent custom design 44k (aCGH)	1	1	0	0	0	0	0	0	0	0
126	other	698	4	1	739	1	603	1	Agilent custom design 44k (aCGH)	1	0	1	0	0	0	1	0	1	1
127	other	1263	4	1	706	1	441	1	Agilent custom design 44k (aCGH)	1	0	1	0	0	0	0	1	1	1
128	case	414	4	1	316	1	289	1	Agilent custom design 44k (aCGH)	1	0	1	0	0	1	0	0	1	1
129	case	1561	4	0	377	1	356	1	Agilent custom design 44k (aCGH)	1	0	0	0	0	1	1	0	1	1
130	other	4078	4	0	673	1	213	1	Agilent custom design 44k (aCGH)	1	0	0	1	0	1	0	1	0	1
131	case	740	4	0	414	1	NA	1	Agilent custom design 44k (aCGH)	1	0	0	1	0	1	0	0	0	1
132	other	2328	4	0	1820	1	974	1	Agilent custom design 44k (aCGH)	1	0	1	0	0	1	0	1	1	1
133	case	356	4	1	412	1	285	1	Agilent custom design 44k (aCGH)	1	0	1	0	0	0	0	0	0	0
134	other	3463	4	0	822	1	696	1	Agilent custom design 44k (aCGH)	1	0	1	0	0	0	1	1	0	1
135	case	587	3	1	215	1	54	1	Agilent custom design 44k (aCGH)	1	0	1	0	0	0	0	1	0	1
136	control	491	4	0	4161	0	4161	0	Agilent Human Genome CGH 44k (aCGH)	1	0	0	1	0	1	1	0	1	1
137	control	407	4	0	6011	0	6011	0	Agilent Human Genome CGH 44k (aCGH)	1	1	0	0	0	0	0	0	0	0
138	control	448	4	0	5326	0	5326	0	Agilent Human Genome CGH 44k (aCGH)	1	0	0	0	0	0	1	1	1	1
139	control	465	4	0	2440	0	2440	0	Agilent Human Genome CGH 44k (aCGH)	1	0	1	1	1	0	0	0	1	1
140	control	541	4	0	3996	0	3996	0	Agilent Human Genome CGH 44k (aCGH)	1	0	0	0	0	1	0	0	0	1
141	other	2227	4	0	1167	1	233	1	Agilent Human Genome CGH 44k (aCGH)	1	0	0	0	0	1	0	0	0	1
142	case	1038	4	0	172	1	139	1	Agilent Human Genome CGH 44k (aCGH)	1	0	1	1	1	1	0	1	0	1
143	other	1098	4	0	1178	1	505	1	Agilent Human Genome CGH 44k (aCGH)	1	0	0	1	0	1	0	0	1	1
144	other	2081	4	1	725	1	426	1	Agilent Human Genome CGH 44k (aCGH)	1	0	1	0	0	0	0	0	0	1
145	other	728	4	0	2569	1	1400	1	Agilent Human Genome CGH 44k (aCGH)	1	0	1	0	1	0	0	1	1	1
146	case	1161	4	0	282	1	160	1	Agilent Human Genome CGH 44k (aCGH)	1	0	0	1	0	1	0	1	1	1
147	other	1528	4	0	914	1	663	1	Agilent Human Genome CGH 44k (aCGH)	1	0	0	0	0	1	0	1	0	1
148	other	1832	4	0	1009	1	823	1	Agilent Human Genome CGH 44k (aCGH)	1	0	1	1	1	1	0	0	0	1
149	other	927	4	0	1109	1	677	1	Agilent Human Genome CGH 44k (aCGH)	1	0	0	1	0	1	0	0	0	1
150	case	1606	4	0	535	1	519	1	Agilent Human Genome CGH 44k (aCGH)	1	0	0	1	1	1	0	0	0	1
151	case	1378	4	1	503	1	412	1	Agilent Human Genome CGH 44k (aCGH)	1	0	1	1	0	1	1	0	1	1
152	case	1481	4	1	8	1	4	1	Agilent Human Genome CGH 44k (aCGH)	1	0	1	0	0	0	0	1	0	1
153	other	1132	4	0	727	1	634	1	Agilent Human Genome CGH 44k (aCGH)	1	0	0	0	0	1	0	0	0	1
154	other	2526	4	0	1018	1	883	1	Agilent Human Genome CGH 44k (aCGH)	1	0	0	0	0	0	0	0	0	1
155	other	677	4	1	641	1	422	1	Agilent Human Genome CGH 44k (aCGH)	1	0	1	0	0	0	0	0	1	0
156	case	1390	4	1	152	1	134	1	Agilent Human Genome CGH 44k (aCGH)	1	0	0	0	0	0	0	1	1	0
157	case	1291	4	1	458	1	356	1	Agilent Human Genome CGH 44k (aCGH)	1	0	1	0	0	0	0	0	0	1
158	other	1431	4	1	829	1	508	1	Agilent Human Genome CGH 44k (aCGH)	1	0	0	0	0	0	0	1	1	1
159	other	1018	4	1	549	1	308	1	Agilent Human Genome CGH 44k (aCGH)	1	0	1	0	0	0	0	0	0	1
160	other	7966	4	0	2220	0	1381	1	Agilent custom design 60k (aCGH)	2	0	0	0	0	0	0	0	0	1
161	case	619	4	0	161	1	129	1	Agilent custom design 60k (aCGH)	2	0	1	0	0	0	0	0	1	1
162	other	1182	4	0	1144	1	721	1	Agilent custom design 60k (aCGH)	2	0	0	1	0	1	0	0	1	1
163	other	4191	1	1	601	1	532	1	Agilent custom design 60k (aCGH)	2	0	0	1	0	1	0	0	0	1
164	case	1032	3	1	369	1	254	1	Agilent custom design 60k (aCGH)	2	0	0	0	0	1	0	1	1	1
165	other	1188	4	1	761	0	478	1	Agilent custom design 60k (aCGH)	2	0	1	0	0	0	0	1	0	1
166	other	283	4	1	902	1	489	1	Agilent custom design 60k (aCGH)	2	0	1	0	0	0	1	0	1	1
167	case	314	3	1	104	1	96	1	Agilent custom design 60k (aCGH)	2	0	1	0	0	0	0	0	1	0
168	other	1716	4	0	518	0	372	1	Agilent custom design 60k (aCGH)	2	0	0	0	0	1	0	0	0	1
169	case	454	4	1	206	1	91	1	Agilent custom design 60k (aCGH)	2	0	1	0	0	0	0	0	0	1
170	case	1068	4	1	386	1	374	1	Agilent custom design 60k (aCGH)	2	0	0	0	0	0	0	0	1	1
171	case	642	4	1	461	1	437	1	Agilent custom design 60k (aCGH)	2	0	1	0	0	0	0	0	0	1
172	other	337	4	1	192	0	192	0	Agilent custom design 60k (aCGH)	2	0	0	0	0	0	0	0	1	0
173	other	405	4	0	3585	1	3585	1	Agilent custom design 44k (aCGH)	2	0	0	0	0	1	0	0	1	1
174	other	483	4	0	4170	1	4170	1	Agilent custom design 44k (aCGH)	2	1	0	0	0	0	0	0	0	0
175	other	628	4	0	1558	1	1558	1	Agilent custom design 44k (aCGH)	2	0	1	0	0	1	1	0	1	0
176	other	437	4	0	3055	1	3055	1	Agilent custom design 44k (aCGH)	2	0	0	1	0	1	0	1	0	1
177	case	560	4	0	374	1	349	1	Agilent custom design 44k (aCGH)	2	0	1	0	0	0	1	0	0	1
178	other	711	4	1	555	1	415	1	Agilent custom design 44k (aCGH)	2	0	1	0	0	0	0	1	0	1
179	other	592	4	1	1395	1	960	1	Agilent custom design 44k (aCGH)	2	0	1	0	0	1	0	0	0	1
180	other	1060	4	1	1131	1	851	1	Agilent custom design 44k (aCGH)	2	0	1	0	0	0	0	0	0	1
181	other	376	4	0	1335	1	1335	1	Agilent custom design 44k (aCGH)	2	0	0	0	0	1	1	0	0	1
182	other	1664	4	0	1369	1	1369	1	Agilent custom design 44k (aCGH)	2	0	0	0	0	1	0	1	0	1
183	other	1297	3	1	4619	1	1945	1	Agilent custom design 44k (aCGH)	2	0	1	0	0	0	0	0	0	0
184	case	801	4	0	334	1	257	1	Agilent custom design 44k (aCGH)	2	0	0	0	0	1	0	0	0	1
185	other	525	4	1	721	1	439	1	Agilent custom design 44k (aCGH)	2	0	1	0	0	0	0	0	1	1
186	other	925	4	0	595	1	431	1	Agilent custom design 44k (aCGH)	2	0	0	1	0	1	1	0	1	1
187	case	687	4	1	340	1	340	1	Agilent custom design 44k (aCGH)	2	0	1	0	0	0	0	0	1	1
188	other	2374	4	0	576	1	511	1	Agilent custom design 44k (aCGH)	2	0	0	0	0	1	0	0	0	1
189	case	913	4	0	487	1	456	1	Agilent custom design 44k (aCGH)	2	0	1	1	1	1	0	0	1	1
190	case	624	4	1	296	1	209	1	Agilent custom design 44k (aCGH)	2	0	1	0	0	0	0	0	1	1
191	case	549	4	1	394	1	394	1	Agilent custom design 44k (aCGH)	2	0	0	0	0	0	0	0	1	0
192	other	1688	4	0	1408	1	1259	1	Agilent custom design 44k (aCGH)	2	0	0	0	0	1	0	1	0	1
193	case	691	4	1	196	1	196	1	Agilent custom design 44k (aCGH)	2	0	1	0	0	0	0	1	1	1
194	other	4957	4	1	1577	0	1577	0	Agilent custom design 44k (aCGH)	2	0	1	1	0	0	0	0	0	1
195	case	851	4	1	63	1	45	1	Agilent custom design 44k (aCGH)	2	0	1	0	0	1	0	1	0	1
196	other	823	4	0	304	0	304	0	Agilent custom design 44k (aCGH)	2	0	0	0	0	0	0	0	1	1
197	case	1502	4	0	284	1	236	1	Agilent custom design 44k (aCGH)	2	0	0	1	0	1	1	1	1	1
198	case	1044	4	0	126	1	73	1	Agilent custom design 44k (aCGH)	2	0	0	0	0	0	0	1	0	0
199	control	973	4	0	4016	0	4016	0	Agilent custom design 44k (aCGH)	2	0	0	0	0	0	0	0	0	1
200	other	375	4	0	256	0	235	0	Agilent custom design 44k (aCGH)	2	0	0	0	0	1	0	0	0	1
201	case	1360	4	0	522	1	522	1	Agilent custom design 44k (aCGH)	2	0	0	0	1	1	0	0	1	1
202	case	2780	4	0	442	1	442	1	Agilent custom design 44k (aCGH)	2	0	1	0	0	1	0	1	1	1
203	case	830	4	1	406	1	334	1	Agilent custom design 44k (aCGH)	2	0	1	0	0	1	0	0	1	1
204	case	3016	4	0	294	1	215	1	Agilent custom design 44k (aCGH)	2	0	0	0	0	1	0	0	0	1
205	other	873	4	1	1176	1	1031	1	Agilent custom design 44k (aCGH)	2	0	1	0	0	0	0	0	1	0
206	case	972	4	0	396	1	384	1	Agilent custom design 44k (aCGH)	2	0	0	1	1	1	0	0	0	1
207	control	470	4	1	2128	0	2128	0	Agilent custom design 44k (aCGH)	2	0	1	0	0	0	1	1	0	0
208	other	848	4	1	638	1	77	1	Agilent custom design 44k (aCGH)	2	0	1	0	0	0	1	1	0	1
209	other	922	4	0	1150	0	1150	0	Agilent custom design 44k (aCGH)	2	0	0	0	0	0	0	1	1	1
210	case	1717	4	0	541	1	508	1	Agilent custom design 44k (aCGH)	2	0	0	1	0	1	0	1	0	1
211	case	1360	4	1	325	1	315	1	Agilent custom design 44k (aCGH)	2	0	1	0	0	0	0	0	1	1
212	other	731	4	0	666	1	638	1	Agilent custom design 44k (aCGH)	2	0	0	0	0	0	0	1	1	0
213	case	1298	4	1	385	1	365	1	Agilent custom design 44k (aCGH)	2	0	0	0	0	0	0	1	1	1
214	other	644	4	1	757	1	660	1	Agilent custom design 44k (aCGH)	2	0	1	0	0	0	0	0	0	1
215	case	565	3	1	178	1	174	1	Agilent custom design 44k (aCGH)	2	0	0	0	0	0	0	0	1	1
216	control	1285	4	0	2750	0	2750	0	Agilent custom design 44k (aCGH)	2	0	0	0	0	0	0	0	1	1
217	case	627	4	0	221	1	206	1	Agilent custom design 44k (aCGH)	2	0	1	0	0	1	0	1	0	1
218	other	2374	4	1	1277	1	549	1	Agilent custom design 44k (aCGH)	2	0	1	0	0	0	0	0	0	0
219	other	538	4	1	853	1	609	1	Agilent custom design 44k (aCGH)	2	0	1	0	0	0	0	0	0	1
220	case	1383	4	0	139	1	93	1	Agilent custom design 44k (aCGH)	2	0	1	0	0	1	1	1	1	1
221	other	1668	4	0	1477	0	1477	0	Agilent custom design 44k (aCGH)	2	0	0	0	1	1	0	0	1	1
222	other	NA	4	1	1192	1	841	1	Agilent custom design 44k (aCGH)	2	0	1	0	0	0	0	0	1	1
223	other	1959	4	0	1417	1	640	1	Agilent custom design 44k (aCGH)	2	0	0	0	0	1	0	0	1	1
224	control	1262	4	0	3208	0	3208	0	Agilent Human Genome CGH 44k (aCGH)	2	0	0	1	1	1	0	0	0	1
225	other	982	4	0	602	1	518	1	Agilent Human Genome CGH 44k (aCGH)	2	0	0	1	1	1	0	0	1	1
226	other	1424	4	0	3809	1	705	1	Agilent Human Genome CGH 44k (aCGH)	2	0	0	0	0	0	0	0	1	0
227	other	933	4	0	1445	1	497	1	Agilent Human Genome CGH 44k (aCGH)	2	0	0	1	0	1	1	0	0	1
228	control	660	4	1	5830	0	5830	0	Agilent Human Genome CGH 44k (aCGH)	2	0	1	0	0	0	0	0	0	1
229	other	4394	4	0	1293	1	486	1	Agilent Human Genome CGH 44k (aCGH)	2	0	0	1	1	1	1	1	1	1
230	case	121	4	1	391	1	326	1	Agilent Human Genome CGH 44k (aCGH)	2	0	1	0	1	0	0	0	1	1
231	other	1841	4	0	626	1	532	1	Agilent Human Genome CGH 44k (aCGH)	2	0	1	0	0	0	0	1	1	0
232	other	5465	4	0	763	1	555	1	Agilent Human Genome CGH 44k (aCGH)	2	0	0	0	0	0	0	0	0	1
233	case	1021	3	1	360	1	246	1	Agilent Human Genome CGH 44k (aCGH)	2	0	1	0	0	0	0	1	1	1
234	case	3394	4	0	479	1	357	1	Agilent Human Genome CGH 44k (aCGH)	2	0	0	0	0	0	0	0	0	1
235	control	1029	4	1	4382	0	4382	0	Agilent Human Genome CGH 44k (aCGH)	2	0	1	0	0	0	0	1	0	1
236	other	625	4	1	1191	1	840	1	Agilent Human Genome CGH 44k (aCGH)	2	0	1	0	0	0	0	0	1	1
237	control	978	4	1	1695	1	1197	1	Agilent Human Genome CGH 44k (aCGH)	2	0	1	0	0	0	0	0	0	1
238	other	379	3	1	1081	1	620	1	Agilent Human Genome CGH 44k (aCGH)	2	0	1	0	0	0	0	0	1	1
239	case	1000	3	1	416	1	402	1	Agilent Human Genome CGH 44k (aCGH)	2	0	1	1	0	1	0	1	0	0
240	other	987	4	0	1362	1	592	1	Agilent Human Genome CGH 44k (aCGH)	2	0	0	1	1	1	0	0	0	1
241	case	589	4	1	375	1	305	1	Agilent Human Genome CGH 44k (aCGH)	2	0	1	0	0	1	0	1	0	0
242	control	1808	4	0	2836	1	2016	1	Agilent Human Genome CGH 44k (aCGH)	2	0	0	1	0	1	0	1	0	1
243	case	3842	4	1	499	1	363	1	Agilent Human Genome CGH 44k (aCGH)	2	0	1	0	0	0	0	1	0	1
244	control	4204	4	0	3843	0	3843	0	Agilent Human Genome CGH 44k (aCGH)	2	0	1	0	0	1	0	1	0	0
245	control	1733	4	0	3794	0	3794	0	Agilent Human Genome CGH 44k (aCGH)	2	0	0	0	0	1	0	0	0	1
246	control	2429	4	0	4369	0	1480	1	Agilent Human Genome CGH 44k (aCGH)	2	0	0	0	0	1	0	0	0	1
247	control	582	4	1	3238	0	3238	0	Agilent Human Genome CGH 44k (aCGH)	2	0	1	0	0	0	0	0	0	1
248	control	1468	4	0	4379	0	4379	0	Agilent Human Genome CGH 44k (aCGH)	2	0	0	0	0	1	1	1	1	1
249	other	708	4	0	856	1	627	1	Agilent Human Genome CGH 44k (aCGH)	2	0	1	1	0	0	1	1	1	1
250	other	1730	4	0	685	0	638	1	Agilent Human Genome CGH 44k (aCGH)	2	0	1	0	0	0	0	0	0	0
251	other	942	4	0	4188	0	562	1	Agilent Human Genome CGH 44k (aCGH)	2	0	0	1	1	1	0	0	1	1
252	other	1648	4	0	570	1	366	1	Agilent Human Genome CGH 105k (aCGH)	2	0	0	0	0	1	0	1	0	1
253	other	8983	4	0	899	1	645	1	Agilent Human Genome CGH 105k (aCGH)	2	0	1	0	0	0	1	1	0	1
254	control	934	4	0	3431	0	3431	0	Agilent Human Genome CGH 105k (aCGH)	2	0	0	1	1	1	0	0	1	1
255	control	92	4s	1	2618	0	2618	0	Agilent Human Genome CGH 105k (aCGH)	2	0	1	0	0	0	0	0	0	1
256	other	1282	4	0	766	1	593	1	Agilent Human Genome CGH 105k (aCGH)	2	0	0	1	0	1	0	0	1	1
257	other	1570	4	0	1152	1	708	1	Agilent Human Genome CGH 105k (aCGH)	2	0	0	1	0	1	0	1	1	1
258	other	1529	4	0	1118	1	532	1	Agilent Human Genome CGH 105k (aCGH)	2	0	0	1	0	0	0	1	1	1
259	control	571	3	1	3915	0	3915	0	Agilent Human Genome CGH 105k (aCGH)	2	0	1	0	0	0	0	0	1	1
260	control	1308	3	1	3878	0	3878	0	Agilent Human Genome CGH 105k (aCGH)	2	0	1	0	0	0	0	1	1	1
261	control	848	3	1	2495	0	2495	0	Agilent Human Genome CGH 105k (aCGH)	2	0	1	0	0	0	0	0	1	1
262	control	823	3	1	3874	0	3874	0	Agilent Human Genome CGH 105k (aCGH)	2	0	1	0	0	0	0	0	0	1
263	case	526	3	1	429	1	295	1	Agilent Human Genome CGH 105k (aCGH)	2	0	0	0	0	0	0	1	0	1
264	case	536	4	1	220	1	212	1	Agilent Human Genome CGH 105k (aCGH)	2	0	1	0	0	0	0	1	0	1
265	case	552	4	0	369	1	344	1	Agilent Human Genome CGH 105k (aCGH)	2	0	1	0	0	0	1	0	0	1
266	other	1558	4	0	3459	0	869	1	Agilent Human Genome CGH 105k (aCGH)	2	0	0	1	0	1	1	1	0	1
267	control	1652	3	1	4413	0	4413	0	Agilent Human Genome CGH 105k (aCGH)	2	0	1	0	0	0	0	0	1	1
268	case	72	4s	1	222	1	174	1	Agilent Human Genome CGH 105k (aCGH)	2	0	1	0	0	0	0	0	0	1
269	case	581	4	1	513	1	423	1	Agilent Human Genome CGH 105k (aCGH)	2	0	1	0	0	0	0	0	0	1
270	other	2544	4	0	1454	1	812	1	Agilent Human Genome CGH 105k (aCGH)	2	0	0	0	0	1	0	0	0	1
271	other	1221	4	0	1401	1	970	1	Agilent Human Genome CGH 105k (aCGH)	2	0	1	0	0	0	0	0	0	1
272	other	3990	4	0	3555	1	764	1	Agilent Human Genome CGH 105k (aCGH)	2	0	0	0	0	0	0	0	0	0
273	case	633	4	1	454	1	431	1	Agilent Human Genome CGH 105k (aCGH)	2	0	1	0	0	0	0	0	0	1
274	other	1319	4	0	2808	1	753	1	Agilent Human Genome CGH 105k (aCGH)	2	0	0	1	0	0	0	1	0	1
275	case	1964	4	1	478	1	441	1	Agilent Human Genome CGH 105k (aCGH)	2	0	1	1	0	0	0	0	1	1
276	control	6	4	1	1147	0	1147	0	Agilent Human Genome CGH 105k (aCGH)	2	0	0	0	0	0	0	0	1	0
277	case	537	4	1	174	1	157	1	Agilent Human Genome CGH 1M (aCGH)	2	0	1	1	0	0	0	1	0	0
278	other	1679	3	1	1655	1	522	1	Agilent Human Genome CGH 1M (aCGH)	2	0	1	0	0	0	0	1	0	1
279	case	196	4s	1	539	1	351	1	Agilent Human Genome CGH 1M (aCGH)	2	0	1	0	0	0	0	1	0	0
280	case	1904	4	1	207	1	201	1	Agilent Human Genome CGH 1M (aCGH)	2	0	1	1	0	1	0	0	0	0
281	control	880	4	1	2842	0	2842	0	Agilent Human Genome CGH 1M (aCGH)	2	0	1	0	0	0	0	0	0	0
282	case	1762	4	0	487	1	444	1	Illumina HumanHap550 Genotyping BeadChip v3 550k (SNP)	3	0	0	0	0	1	0	0	0	1
283	control	1314	4	0	5296	0	5296	0	Illumina HumanHap550 Genotyping BeadChip v3 550k (SNP)	3	0	0	1	1	1	0	0	0	1
284	case	773	4	0	467	1	401	1	Illumina HumanHap550 Genotyping BeadChip v3 550k (SNP)	3	0	1	0	0	0	0	0	1	0
285	control	1046	4	0	5564	0	5564	0	Illumina HumanHap550 Genotyping BeadChip v3 550k (SNP)	3	0	0	0	0	0	0	0	1	0
286	control	987	4	0	4863	0	4863	0	Illumina HumanHap550 Genotyping BeadChip v3 550k (SNP)	3	0	0	1	1	1	0	0	1	1
287	control	557	4	0	2872	0	2872	0	Illumina HumanHap550 Genotyping BeadChip v3 550k (SNP)	3	0	0	0	0	0	0	0	0	1
288	control	1817	4	0	4715	0	4715	0	Illumina HumanHap550 Genotyping BeadChip v3 550k (SNP)	3	0	0	1	0	1	0	0	0	1
289	control	1916	4	0	4596	0	165	1	Illumina HumanHap550 Genotyping BeadChip v3 550k (SNP)	3	0	1	1	1	0	1	1	0	1
290	other	1723	4	1	1083	1	579	1	Illumina HumanHap550 Genotyping BeadChip v3 550k (SNP)	3	0	0	0	0	0	0	0	1	0
291	control	1837	4	0	4670	0	4670	0	Illumina HumanHap550 Genotyping BeadChip v3 550k (SNP)	3	0	0	0	0	1	0	0	0	1
292	other	1041	4	0	1175	1	802	1	Illumina HumanHap550 Genotyping BeadChip v3 550k (SNP)	3	0	0	0	0	1	0	0	0	1
293	other	780	4	1	1749	0	1749	0	Illumina HumanHap550 Genotyping BeadChip v3 550k (SNP)	3	0	1	0	0	0	0	0	0	1
294	case	948	4	1	455	1	439	1	Illumina HumanHap550 Genotyping BeadChip v3 550k (SNP)	3	0	0	0	0	0	0	0	0	1
295	case	806	4	0	444	1	336	1	Illumina HumanHap550 Genotyping BeadChip v3 550k (SNP)	3	0	0	0	0	1	0	1	1	1
296	other	2577	4	0	1409	1	1022	1	Illumina HumanHap550 Genotyping BeadChip v3 550k (SNP)	3	0	1	0	0	1	0	1	1	1
297	case	950	4	1	477	1	454	1	Illumina HumanHap550 Genotyping BeadChip v3 550k (SNP)	3	0	1	0	0	0	0	0	1	1
298	control	1040	4	1	3235	0	148	1	Illumina HumanHap550 Genotyping BeadChip v3 550k (SNP)	3	0	0	0	0	1	0	1	1	0
299	case	1528	4	0	443	1	203	1	Illumina Genotyping BeadChip 600k (SNP)	3	0	0	0	0	1	0	1	0	1
300	other	1494	4	0	729	1	447	1	Illumina HumanHap550 Genotyping BeadChip v3 550k (SNP)	3	0	0	1	0	1	0	0	0	1
301	other	561	4	1	1375	0	1375	0	Illumina HumanHap550 Genotyping BeadChip v3 550k (SNP)	3	0	1	1	0	0	0	0	0	1
302	case	1128	4	0	219	1	148	1	Illumina HumanHap550 Genotyping BeadChip v3 550k (SNP)	3	1	0	0	0	0	0	0	0	0
303	other	670	4	1	698	1	423	1	Illumina HumanHap550 Genotyping BeadChip v3 550k (SNP)	3	0	1	0	0	0	0	0	1	1
304	control	1174	4	0	4286	0	4286	0	Illumina HumanHap550 Genotyping BeadChip v3 550k (SNP)	3	0	0	0	0	1	0	0	0	1
305	control	529	4	1	2740	0	2740	0	Illumina HumanHap550 Genotyping BeadChip v3 550k (SNP)	3	0	1	0	0	0	0	0	1	1
306	case	3115	4	1	416	1	246	1	Illumina HumanHap550 Genotyping BeadChip v3 550k (SNP)	3	0	1	0	0	1	0	1	0	1
307	other	2274	4	0	3691	1	3691	1	Illumina HumanHap550 Genotyping BeadChip v3 550k (SNP)	3	0	0	0	1	1	0	0	0	1
308	case	704	4	1	429	1	316	1	Illumina Genotyping BeadChip 600k (SNP)	3	0	1	0	0	0	0	0	0	1
309	control	1124	4	1	4443	0	4443	0	Illumina Genotyping BeadChip 600k (SNP)	3	0	1	0	0	0	0	1	0	1
310	control	1255	4	0	4099	0	4099	0	Illumina Genotyping BeadChip 600k (SNP)	3	0	0	0	0	1	0	0	1	1
311	control	1410	4	0	3235	0	3235	0	Illumina Genotyping BeadChip 600k (SNP)	3	0	0	0	0	1	0	1	1	1
312	other	1332	4	0	1013	1	454	1	Illumina Genotyping BeadChip 600k (SNP)	3	0	1	0	0	1	0	1	0	1
313	other	1408	4	0	875	1	875	1	Illumina Genotyping BeadChip 600k (SNP)	3	0	0	1	1	1	0	0	0	1
314	case	1605	4	1	449	1	447	1	Illumina Genotyping BeadChip 600k (SNP)	3	0	0	0	0	0	0	0	1	0
315	case	898	4	0	435	1	435	1	Illumina Genotyping BeadChip 600k (SNP)	3	0	0	1	1	1	0	0	1	1
316	control	594	4	0	2884	0	2884	0	Illumina Genotyping BeadChip 600k (SNP)	3	0	0	0	1	0	0	0	0	1
317	control	854	4	1	2826	0	2826	0	Illumina Genotyping BeadChip 600k (SNP)	3	0	0	1	0	1	0	1	0	1
318	case	1070	4	0	421	1	410	1	Illumina Genotyping BeadChip 600k (SNP)	3	0	1	1	1	0	0	0	0	1
319	other	656	4	1	878	1	878	1	Illumina Genotyping BeadChip 600k (SNP)	3	0	0	0	0	0	0	0	1	1
320	case	728	4	0	317	1	225	1	Illumina Genotyping BeadChip 600k (SNP)	3	0	0	0	0	1	0	0	0	0
321	other	1034	4	0	804	1	684	1	Illumina Genotyping BeadChip 600k (SNP)	3	0	0	0	0	0	0	0	0	1
322	other	1499	4	0	1832	1	1832	1	Illumina Genotyping BeadChip 600k (SNP)	3	0	0	1	0	1	0	0	0	1
323	control	1689	4	0	2142	0	2142	0	Illumina Genotyping BeadChip 600k (SNP)	3	0	0	0	0	0	0	0	0	1
324	other	1123	4	0	1602	1	669	1	Illumina Genotyping BeadChip 600k (SNP)	3	0	0	1	0	1	1	1	1	1
325	other	1227	4	1	784	1	784	1	Illumina Genotyping BeadChip 600k (SNP)	3	0	1	0	0	0	0	0	0	1
326	control	1078	4	0	2206	0	2206	0	Illumina HumanHap550 Genotyping BeadChip v1 550k (SNP)	3	0	1	0	0	0	0	1	1	1
327	control	1315	4	0	2220	0	2220	0	Illumina HumanHap550 Genotyping BeadChip v3 550k (SNP)	3	0	0	1	0	1	0	1	1	1
328	other	723	4	0	602	1	487	1	Illumina HumanHap550 Genotyping BeadChip v1 550k (SNP)	3	0	1	1	0	1	0	0	1	1
329	other	1221	4	0	623	0	623	0	Illumina HumanHap550 Genotyping BeadChip v1 550k (SNP)	3	0	1	0	0	0	1	1	0	0
330	other	564	4	1	1367	1	143	1	Illumina HumanHap550 Genotyping BeadChip v1 550k (SNP)	3	0	1	0	0	1	0	0	1	1
331	other	1975	4	0	1235	1	1170	1	Illumina HumanHap550 Genotyping BeadChip v3 550k (SNP)	3	0	0	1	0	1	0	1	1	1
332	other	1194	4	0	864	1	864	1	Illumina HumanHap550 Genotyping BeadChip v1 550k (SNP)	3	0	0	0	0	1	0	0	1	1
333	other	1098	4	0	1049	1	536	1	Illumina HumanHap550 Genotyping BeadChip v1 550k (SNP)	3	0	0	0	0	1	1	0	0	1
334	other	1108	4	0	1821	0	1821	0	Illumina HumanHap550 Genotyping BeadChip v1 550k (SNP)	3	0	0	0	0	0	0	1	0	0
335	other	882	4	0	1795	1	1795	1	Illumina HumanHap550 Genotyping BeadChip v1 550k (SNP)	3	0	0	1	0	1	1	1	1	1
336	other	673	4	1	2	0	2	0	Illumina HumanHap550 Genotyping BeadChip v1 550k (SNP)	3	0	1	0	0	0	0	0	1	1
337	other	839	4	0	915	1	915	1	Illumina HumanHap550 Genotyping BeadChip v1 550k (SNP)	3	0	0	0	0	1	0	0	0	1
338	case	687	4	1	462	1	462	1	Illumina HumanHap550 Genotyping BeadChip v1 550k (SNP)	3	0	1	0	0	0	0	1	0	1
339	control	802	4	1	1964	0	1964	0	Illumina HumanHap550 Genotyping BeadChip v1 550k (SNP)	3	0	0	0	0	0	0	0	1	0
340	other	1100	4	0	1485	1	1485	1	Illumina HumanHap550 Genotyping BeadChip v1 550k (SNP)	3	0	1	1	1	0	0	0	0	1
341	other	999	4	0	1640	0	1640	0	Illumina HumanHap550 Genotyping BeadChip v1 550k (SNP)	3	0	0	0	0	1	0	0	0	1
342	control	796	4	0	4822	0	4822	0	Illumina HumanHap550 Genotyping BeadChip v1 550k (SNP)	3	0	0	1	1	1	0	0	1	1
343	other	971	4	0	731	1	491	1	Illumina HumanHap550 Genotyping BeadChip v1 550k (SNP)	3	0	1	1	0	1	1	0	1	1
344	other	828	4	1	1115	1	614	1	Illumina HumanHap550 Genotyping BeadChip v3 550k (SNP)	3	0	1	1	0	0	0	0	1	1
345	control	652	4	0	3957	0	3957	0	Illumina Genotyping BeadChip 600k (SNP)	3	0	1	0	0	0	0	1	1	1
346	case	1083	4	1	463	1	456	1	Illumina HumanHap550 Genotyping BeadChip v1 550k (SNP)	3	0	1	0	0	0	0	0	1	1
347	other	1285	4	0	2653	1	144	1	Illumina HumanHap550 Genotyping BeadChip v1 550k (SNP)	3	0	0	0	0	1	0	0	1	1
348	case	860	4	1	406	1	246	1	Illumina HumanHap550 Genotyping BeadChip v1 550k (SNP)	3	0	1	0	0	0	0	0	0	1
349	other	1758	4	0	2846	1	2820	1	Illumina HumanHap550 Genotyping BeadChip v3 550k (SNP)	3	0	0	1	1	1	0	1	1	1
350	other	804	4	0	1073	1	611	1	Illumina HumanHap550 Genotyping BeadChip v1 550k (SNP)	3	0	0	1	0	1	0	0	0	1
351	other	848	4	1	1131	1	981	1	Illumina HumanHap550 Genotyping BeadChip v1 550k (SNP)	3	0	1	0	0	0	0	0	1	1
352	case	737	4	1	353	1	345	1	Illumina Genotyping BeadChip 600k (SNP)	3	0	0	0	0	0	0	0	1	1
353	control	666	4	1	4569	0	4569	0	Illumina Human610-Quad v1.0 BeadChip 610k (SNP)	3	0	0	0	0	0	0	0	0	0
354	other	1152	4	0	670	1	651	1	Illumina HumanHap550 Genotyping BeadChip v1 550k (SNP)	3	0	0	1	1	1	0	0	1	1
355	other	956	4	1	883	0	883	0	Illumina HumanHap550 Genotyping BeadChip v1 550k (SNP)	3	0	0	0	0	0	0	0	0	0
356	case	1634	4	0	433	1	347	1	Illumina HumanHap550 Genotyping BeadChip v1 550k (SNP)	3	0	0	0	0	1	0	1	1	1
357	other	1279	4	0	1395	1	684	1	Illumina HumanHap550 Genotyping BeadChip v1 550k (SNP)	3	0	0	0	0	1	0	1	0	1
358	case	860	4	1	38	1	38	1	Illumina HumanHap550 Genotyping BeadChip v1 550k (SNP)	3	0	1	0	0	1	0	0	1	1
359	other	1635	4	0	2836	1	1493	1	Illumina HumanHap550 Genotyping BeadChip v3 550k (SNP)	3	0	0	1	0	1	0	0	0	1
360	control	1800	4	1	4334	0	4334	0	Illumina HumanHap550 Genotyping BeadChip v1 550k (SNP)	3	0	1	1	0	0	0	0	0	1
361	control	1238	4	0	4366	0	4366	0	Illumina HumanHap550 Genotyping BeadChip v1 550k (SNP)	3	0	0	0	1	0	0	0	1	1
362	control	823	4	1	4399	0	4399	0	Illumina HumanHap550 Genotyping BeadChip v1 550k (SNP)	3	0	1	0	0	0	0	0	1	1
363	other	569	4	1	750	1	589	1	Illumina Genotyping BeadChip 600k (SNP)	3	0	0	0	0	0	0	0	0	0
364	other	1439	4	0	954	1	538	1	Illumina Human610-Quad v1.0 BeadChip 610k (SNP)	3	0	0	0	0	0	0	0	0	0
365	control	1607	4	0	4470	0	4470	0	Illumina Genotyping BeadChip 600k (SNP)	3	0	0	0	0	0	0	0	0	1
366	control	1155	4	0	4336	0	4336	0	Illumina HumanHap550 Genotyping BeadChip v1 550k (SNP)	3	1	0	0	0	0	0	0	0	0
367	case	700	4	1	400	1	381	1	Illumina Human610-Quad v1.0 BeadChip 610k (SNP)	3	0	1	0	0	0	0	0	0	1
368	other	1157	4	0	2103	1	1566	1	Illumina HumanHap550 Genotyping BeadChip v1 550k (SNP)	3	0	0	1	0	1	0	0	1	1
369	control	709	4	0	2536	0	2536	0	Illumina HumanHap550 Genotyping BeadChip v1 550k (SNP)	3	1	0	0	0	0	0	0	0	0
370	other	782	4	0	656	1	598	1	Illumina HumanHap550 Genotyping BeadChip v1 550k (SNP)	3	0	1	1	1	1	0	0	1	1
371	other	1367	4	0	551	1	523	1	Illumina HumanHap550 Genotyping BeadChip v3 550k (SNP)	3	0	1	1	1	1	0	1	0	1
372	other	720	4	1	2195	1	1727	1	Illumina HumanHap550 Genotyping BeadChip v1 550k (SNP)	3	0	1	0	0	0	0	0	1	1
373	control	1105	4	0	4306	0	4306	0	Illumina HumanHap550 Genotyping BeadChip v1 550k (SNP)	3	0	1	1	1	1	0	0	0	1
374	control	1002	4	0	4376	0	4376	0	Illumina HumanHap550 Genotyping BeadChip v1 550k (SNP)	3	0	1	1	1	1	0	0	1	1
375	other	1214	4	0	1284	1	693	1	Illumina HumanHap550 Genotyping BeadChip v3 550k (SNP)	3	0	0	0	0	1	0	0	1	1
376	other	1133	4	0	1497	1	933	1	Illumina HumanHap550 Genotyping BeadChip v1 550k (SNP)	3	0	0	0	0	1	0	0	1	1
377	other	1810	4	0	1033	1	217	1	Illumina HumanHap550 Genotyping BeadChip v1 550k (SNP)	3	0	1	1	1	1	1	1	0	1
378	other	1232	4	0	809	1	748	1	Illumina HumanHap550 Genotyping BeadChip v3 550k (SNP)	3	0	0	0	0	1	0	1	0	1
379	other	1544	4	0	803	1	417	1	Illumina HumanHap550 Genotyping BeadChip v1 550k (SNP)	3	0	0	1	0	1	0	0	0	1
380	other	1131	4	0	1408	1	569	1	Illumina HumanHap550 Genotyping BeadChip v1 550k (SNP)	3	0	0	0	0	0	1	0	1	1
381	control	635	4	0	4257	0	4257	0	Illumina HumanHap550 Genotyping BeadChip v1 550k (SNP)	3	0	0	1	1	1	1	0	0	1
382	control	1564	4	1	2606	0	2606	0	Illumina HumanHap550 Genotyping BeadChip v1 550k (SNP)	3	0	1	0	1	0	0	1	1	1
383	control	699	4	1	1934	0	1494	1	Illumina HumanHap550 Genotyping BeadChip v1 550k (SNP)	3	0	1	0	0	0	0	0	0	1
384	case	1352	4	0	243	1	233	1	Illumina HumanHap550 Genotyping BeadChip v1 550k (SNP)	3	0	0	0	0	1	0	1	0	1
385	control	1398	4	0	3571	0	3571	0	Illumina HumanHap550 Genotyping BeadChip v1 550k (SNP)	3	1	0	0	0	0	0	0	0	0
386	other	765	4	1	718	1	376	1	Illumina Human610-Quad v1.0 BeadChip 610k (SNP)	3	0	1	1	0	1	0	0	0	1
387	case	1222	4	1	147	1	147	1	Illumina HumanHap550 Genotyping BeadChip v1 550k (SNP)	3	0	1	0	0	0	0	0	0	1
388	control	1499	4	0	4195	0	4195	0	Illumina HumanHap550 Genotyping BeadChip v1 550k (SNP)	3	0	0	0	0	0	0	0	0	1
389	control	946	4	0	4207	0	4207	0	Illumina HumanHap550 Genotyping BeadChip v1 550k (SNP)	3	0	1	1	0	1	1	0	1	1
390	control	952	4	0	2593	0	2593	0	Illumina HumanHap550 Genotyping BeadChip v1 550k (SNP)	3	0	1	0	0	1	0	1	1	1
391	case	812	4	1	409	1	351	1	Illumina HumanHap550 Genotyping BeadChip v1 550k (SNP)	3	0	1	0	0	0	0	0	0	1
392	case	1661	4	1	197	1	140	1	Illumina HumanHap550 Genotyping BeadChip v1 550k (SNP)	3	0	1	0	0	0	0	1	0	1
393	control	1235	4	0	3827	0	3827	0	Illumina HumanHap550 Genotyping BeadChip v1 550k (SNP)	3	0	0	0	0	1	1	0	1	0
394	other	1531	4	0	837	1	361	1	Illumina HumanHap550 Genotyping BeadChip v1 550k (SNP)	3	0	0	1	0	1	0	0	0	1
395	case	596	4	1	345	1	292	1	Illumina HumanHap550 Genotyping BeadChip v1 550k (SNP)	3	0	1	0	0	0	0	0	1	1
396	control	1663	4	0	2959	0	2959	0	Illumina HumanHap550 Genotyping BeadChip v1 550k (SNP)	3	0	0	1	0	1	1	1	0	1
397	control	1526	4	0	3807	0	3807	0	Illumina HumanHap550 Genotyping BeadChip v1 550k (SNP)	3	0	1	0	0	0	0	1	0	1
398	other	4795	4	0	1223	1	1223	1	Illumina HumanHap550 Genotyping BeadChip 550k (SNP)	3	0	1	0	1	1	0	1	0	1
399	other	1489	4	1	1166	1	699	1	Illumina HumanHap550 Genotyping BeadChip v1 550k (SNP)	3	0	1	0	0	0	0	0	1	1
400	other	825	4	1	667	1	667	1	Illumina HumanHap550 Genotyping BeadChip v1 550k (SNP)	3	0	1	0	0	0	0	0	1	1
401	case	663	4	0	22	1	22	1	Illumina HumanHap550 Genotyping BeadChip v1 550k (SNP)	3	0	0	0	0	1	1	1	1	1
402	other	1978	4	0	1540	1	678	1	Illumina HumanHap550 Genotyping BeadChip 550k (SNP)	3	0	0	1	1	1	0	0	1	1
403	control	1327	4	1	3604	0	3604	0	Illumina HumanHap550 Genotyping BeadChip v3 550k (SNP)	3	0	1	0	0	1	0	0	0	1
404	other	1059	4	0	995	1	392	1	Illumina HumanHap550 Genotyping BeadChip v3 550k (SNP)	3	0	0	1	0	1	1	0	0	1
405	control	958	4	1	3720	0	3720	0	Illumina HumanHap550 Genotyping BeadChip v1 550k (SNP)	3	0	1	0	0	0	0	0	0	1
406	case	713	4	1	421	1	374	1	Illumina HumanHap550 Genotyping BeadChip v1 550k (SNP)	3	0	1	0	0	0	0	0	0	0
407	control	847	4	1	3571	0	3571	0	Illumina HumanHap550 Genotyping BeadChip v1 550k (SNP)	3	0	1	1	0	0	0	0	1	1
408	control	602	4	1	3513	0	603	1	Illumina HumanHap550 Genotyping BeadChip v1 550k (SNP)	3	0	1	1	0	1	0	0	1	1
409	other	614	4	1	763	1	533	1	Illumina HumanHap550 Genotyping BeadChip v1 550k (SNP)	3	0	1	0	0	0	0	0	0	1
410	other	753	4	1	1049	1	607	1	Illumina HumanHap550 Genotyping BeadChip v1 550k (SNP)	3	0	1	0	0	0	0	0	0	1
411	other	1030	4	0	920	1	168	1	Illumina HumanHap550 Genotyping BeadChip v1 550k (SNP)	3	0	0	1	0	1	0	1	0	1
412	other	1064	4	0	659	1	470	1	Illumina HumanHap550 Genotyping BeadChip v1 550k (SNP)	3	0	1	0	1	0	0	0	0	0
413	other	1646	4	1	1696	0	1696	0	Illumina HumanHap550 Genotyping BeadChip v1 550k (SNP)	3	0	1	0	0	0	0	1	0	1
414	other	1129	4	0	821	1	303	1	Illumina HumanHap550 Genotyping BeadChip v1 550k (SNP)	3	0	0	0	1	1	0	0	0	0
415	case	921	4	1	209	1	159	1	Illumina HumanHap550 Genotyping BeadChip v1 550k (SNP)	3	0	1	0	0	0	0	1	0	1
416	case	1010	4	1	500	1	500	1	Illumina HumanHap550 Genotyping BeadChip v3 550k (SNP)	3	0	0	0	0	0	0	0	1	0
417	other	1973	4	0	1212	1	830	1	Illumina HumanHap550 Genotyping BeadChip 550k (SNP)	3	0	0	1	1	1	0	0	0	1
418	control	1080	4	0	3509	0	3509	0	Illumina HumanHap550 Genotyping BeadChip v1 550k (SNP)	3	0	0	0	0	1	0	0	0	1
419	case	1117	4	0	416	1	363	1	Illumina Human610-Quad v1.0 BeadChip 610k (SNP)	3	0	0	0	0	1	0	0	0	0
420	control	1730	4	0	2178	0	408	1	Illumina Human610-Quad v1.0 BeadChip 610k (SNP)	3	0	0	0	0	0	0	0	0	1
421	control	4781	4	0	3365	0	3365	0	Illumina HumanHap550 Genotyping BeadChip 550k (SNP)	3	0	0	0	0	0	0	0	0	1
422	control	2234	4	0	3390	0	3390	0	Illumina HumanHap550 Genotyping BeadChip 550k (SNP)	3	0	1	1	1	1	0	0	0	1
423	case	1486	4	1	404	1	356	1	Illumina HumanHap550 Genotyping BeadChip v1 550k (SNP)	3	0	1	1	0	0	0	1	0	1
424	control	948	4	1	3187	0	3187	0	Illumina HumanHap550 Genotyping BeadChip v1 550k (SNP)	3	0	1	0	0	0	0	0	1	0
425	case	2937	4	0	345	1	267	1	Illumina HumanHap550 Genotyping BeadChip 550k (SNP)	3	0	0	0	0	0	0	0	0	0
426	case	1216	4	0	495	1	495	1	Illumina HumanHap550 Genotyping BeadChip v3 550k (SNP)	3	0	1	0	0	0	0	1	0	1
427	case	993	4	0	283	1	281	1	Illumina HumanHap550 Genotyping BeadChip v1 550k (SNP)	3	0	0	1	0	1	0	0	0	1
428	other	614	4	0	1417	0	1417	0	Illumina HumanHap550 Genotyping BeadChip v3 550k (SNP)	3	0	0	0	0	0	0	0	0	0
429	other	1454	4	0	2528	1	2528	1	Illumina HumanHap550 Genotyping BeadChip v1 550k (SNP)	3	0	0	1	1	1	0	0	0	1
430	other	1713	4	0	934	1	934	1	Illumina HumanHap550 Genotyping BeadChip v3 550k (SNP)	3	0	0	0	0	1	0	0	0	1
431	control	677	4	1	2777	0	2777	0	Illumina HumanHap550 Genotyping BeadChip v3 550k (SNP)	3	0	0	0	0	0	0	0	1	0
432	other	1800	4	0	586	1	552	1	Illumina HumanHap550 Genotyping BeadChip v3 550k (SNP)	3	0	0	0	0	0	0	1	1	0
433	other	1074	4	0	723	1	470	1	Illumina HumanHap550 Genotyping BeadChip v3 550k (SNP)	3	0	1	1	0	0	0	1	0	0
434	control	1860	4	1	3141	0	3141	0	Illumina HumanHap550 Genotyping BeadChip 550k (SNP)	3	0	1	0	1	0	0	0	1	1
435	case	1710	4	0	430	1	172	1	Illumina HumanHap550 Genotyping BeadChip v3 550k (SNP)	3	0	1	0	0	1	0	1	1	1
436	other	2008	4	1	2636	1	2236	1	Illumina HumanHap550 Genotyping BeadChip 550k (SNP)	3	0	1	0	0	0	0	0	0	1
437	control	696	4	0	3096	0	3096	0	Illumina HumanHap550 Genotyping BeadChip v3 550k (SNP)	3	0	1	1	0	1	0	0	1	1
438	case	990	4	1	150	1	138	1	Illumina Human610-Quad v1.0 BeadChip 610k (SNP)	3	0	0	0	0	0	0	0	0	0
439	control	1050	4	1	3130	0	3130	0	Illumina HumanHap550 Genotyping BeadChip v3 550k (SNP)	3	0	1	0	0	0	0	0	0	1
440	case	611	4	1	26	1	26	1	Illumina HumanHap550 Genotyping BeadChip v3 550k (SNP)	3	0	0	0	0	0	0	0	0	0
441	case	890	4	1	24	1	24	1	Illumina Genotyping BeadChip 600k (SNP)	3	0	1	0	0	0	0	0	0	1
442	case	806	4	0	470	1	453	1	Illumina HumanHap550 Genotyping BeadChip v3 550k (SNP)	3	0	0	0	0	0	0	1	1	1
443	case	710	4	1	465	1	260	1	Illumina HumanHap550 Genotyping BeadChip v3 550k (SNP)	3	0	0	0	0	0	0	0	1	0
444	other	2547	4	0	2384	1	978	1	Illumina HumanHap550 Genotyping BeadChip 550k (SNP)	3	0	0	1	1	0	0	0	1	1
445	case	720	4	1	203	1	203	1	Illumina Genotyping BeadChip 600k (SNP)	3	0	0	0	0	0	0	0	0	0
446	other	1731	4	0	617	1	617	1	Illumina HumanHap550 Genotyping BeadChip v3 550k (SNP)	3	0	1	1	0	1	0	1	1	1
447	other	573	4	1	2056	1	1710	1	Illumina Genotyping BeadChip 600k (SNP)	3	0	1	0	0	0	0	0	0	1
448	other	1330	4	0	1019	1	573	1	Illumina Human610-Quad v1.0 BeadChip 610k (SNP)	3	0	0	0	0	1	0	0	0	1
449	control	1337	4	1	2704	0	369	1	Illumina Genotyping BeadChip 600k (SNP)	3	0	0	0	0	0	0	0	0	1
450	control	1267	4	0	2518	0	2518	0	Illumina Genotyping BeadChip 600k (SNP)	3	0	0	1	0	1	0	0	0	1
451	other	1208	4	1	1492	1	372	1	Illumina Genotyping BeadChip 600k (SNP)	3	0	1	0	0	0	0	0	1	1
452	other	1244	4	0	2679	1	617	1	Illumina Human610-Quad v1.0 BeadChip 610k (SNP)	3	0	0	1	0	1	0	0	0	1
453	control	1514	4	1	2955	0	2955	0	Illumina Genotyping BeadChip 600k (SNP)	3	0	1	0	0	0	0	1	1	1
454	control	559	4	1	2821	0	2821	0	Illumina Human610-Quad v1.0 BeadChip 610k (SNP)	3	0	1	0	0	0	0	0	0	1
455	control	515	4	0	2814	0	2814	0	Illumina Genotyping BeadChip 600k (SNP)	3	0	0	0	0	0	0	0	0	0
456	control	3425	3	1	2958	0	2958	0	Illumina Genotyping BeadChip 600k (SNP)	3	0	1	0	0	0	0	0	0	1
457	case	1223	4	1	284	1	284	1	Illumina Genotyping BeadChip 600k (SNP)	3	0	1	0	0	0	0	0	0	1
458	case	557	4	1	237	1	237	1	Illumina Genotyping BeadChip 600k (SNP)	3	0	0	0	0	0	0	0	0	1
459	control	1010	4	1	2386	0	2386	0	Illumina Genotyping BeadChip 600k (SNP)	3	0	1	0	0	0	0	0	0	1
460	other	974	4	1	827	1	607	1	Illumina Genotyping BeadChip 600k (SNP)	3	0	0	0	0	0	0	1	0	1
461	control	1442	4	0	2609	0	2609	0	Illumina Genotyping BeadChip 600k (SNP)	3	0	0	0	0	0	0	0	0	1
462	other	1326	4	0	2232	1	646	1	Illumina Genotyping BeadChip 600k (SNP)	3	0	1	1	1	0	0	0	1	0
463	control	1052	4	0	2757	0	523	1	Illumina Human610-Quad v1.0 BeadChip 610k (SNP)	3	0	0	1	1	1	0	0	0	1
464	control	568	4	0	2603	0	2603	0	Illumina Human610-Quad v1.0 BeadChip 610k (SNP)	3	1	0	0	0	0	0	0	0	0
465	other	1112	4	0	781	1	386	1	Illumina Genotyping BeadChip 600k (SNP)	3	0	0	0	0	1	0	0	0	1
466	control	1704	4	0	2744	0	2744	0	Illumina Human610-Quad v1.0 BeadChip 610k (SNP)	3	0	0	1	1	1	0	0	0	1
467	control	1394	4	0	2457	0	2457	0	Illumina Genotyping BeadChip 600k (SNP)	3	1	0	0	0	0	0	0	0	0
468	control	832	4	1	2409	0	2409	0	Illumina Genotyping BeadChip 600k (SNP)	3	0	1	0	0	0	0	1	0	1
469	case	733	4	1	108	1	108	1	Illumina Human610-Quad v1.0 BeadChip 610k (SNP)	3	0	0	1	0	0	0	0	0	1
470	control	1459	4	0	2540	0	721	1	Illumina Genotyping BeadChip 600k (SNP)	3	0	0	1	0	1	1	0	0	1
471	other	656	4	1	1912	1	1002	1	Illumina Genotyping BeadChip 600k (SNP)	3	0	1	0	0	0	0	0	0	1
472	control	1205	4	0	2485	0	2485	0	Illumina Genotyping BeadChip 600k (SNP)	3	0	0	1	1	1	0	1	0	1
473	other	945	4	0	1722	1	291	1	Illumina Genotyping BeadChip 600k (SNP)	3	0	0	1	0	1	0	0	1	1
474	case	1071	4	1	318	1	318	1	Illumina Genotyping BeadChip 600k (SNP)	3	0	1	0	0	0	0	0	1	1
475	other	1448	4	1	907	1	415	1	Illumina Genotyping BeadChip 600k (SNP)	3	0	1	0	0	0	0	0	1	1
476	control	1495	4	0	2204	0	1086	1	Illumina Genotyping BeadChip 600k (SNP)	3	0	0	1	0	1	0	0	0	1
477	other	705	4	1	572	1	478	1	Illumina Genotyping BeadChip 600k (SNP)	3	0	1	0	0	0	0	0	1	1
478	other	658	4	0	752	1	516	1	Illumina Genotyping BeadChip 600k (SNP)	3	0	0	1	0	0	0	0	0	1
479	other	893	4	0	1459	1	441	1	Illumina Genotyping BeadChip 600k (SNP)	3	0	0	1	1	1	0	0	0	1
480	other	1543	4	0	1297	1	1297	1	Illumina Genotyping BeadChip 600k (SNP)	3	0	0	0	0	1	0	0	0	1
481	control	911	4	0	2178	0	2178	0	Illumina Human610-Quad v1.0 BeadChip 610k (SNP)	3	0	0	1	1	1	0	0	0	1
482	control	644	4	1	2268	0	964	1	Illumina Genotyping BeadChip 600k (SNP)	3	0	1	0	1	0	0	0	0	1
483	other	1622	4	0	833	1	610	1	Illumina Genotyping BeadChip 600k (SNP)	3	0	0	0	1	1	0	0	1	1
484	case	1057	4	0	398	1	305	1	Illumina Genotyping BeadChip 600k (SNP)	3	0	0	0	1	1	0	0	1	0
485	other	1972	4	0	1438	1	438	1	Illumina Genotyping BeadChip 600k (SNP)	3	0	0	0	0	0	0	0	0	0
486	other	522	4	1	682	1	455	1	Illumina Genotyping BeadChip 600k (SNP)	3	0	1	0	0	0	0	1	1	1
487	other	7446	4	0	1682	1	595	1	Illumina Genotyping BeadChip 600k (SNP)	3	0	1	1	1	1	0	0	0	0
488	other	1218	4	0	830	1	546	1	Illumina Human610-Quad v1.0 BeadChip 610k (SNP)	3	0	0	0	0	1	0	0	0	1
489	other	1096	4	1	670	1	NA	NA	Affymetrix GeneChip Mapping 250K Nsp (SNP)	4	0	1	0	0	0	0	1	1	1
490	control	396	2a	1	3257	0	NA	NA	Affymetrix GeneChip Mapping 250K Nsp (SNP)	4	0	1	0	0	0	0	0	0	1
491	other	730	2a	1	700	1	NA	NA	Affymetrix GeneChip Mapping 250K Nsp (SNP)	4	0	1	0	0	1	1	1	1	1
492	other	426	2a	1	1826	0	NA	NA	Affymetrix GeneChip Mapping 250K Nsp (SNP)	4	0	1	0	0	0	0	1	0	1
493	control	1096	3	1	4413	0	NA	NA	Affymetrix GeneChip Mapping 250K Nsp (SNP)	4	0	1	0	0	0	0	1	1	1
494	other	1491	3	1	1309	1	NA	NA	Affymetrix GeneChip Mapping 250K Nsp (SNP)	4	0	1	0	0	0	0	0	1	1
495	other	1491	3	1	1126	1	NA	NA	Affymetrix GeneChip Mapping 250K Nsp (SNP)	4	0	1	0	0	0	1	0	0	1
496	other	1035	3	1	791	1	NA	NA	Affymetrix GeneChip Mapping 250K Nsp (SNP)	4	0	1	0	0	0	0	0	0	1
497	case	548	3	1	304	1	NA	NA	Affymetrix GeneChip Mapping 250K Nsp (SNP)	4	0	1	0	0	0	0	0	1	1
498	other	2070	4	0	1522	1	NA	NA	Affymetrix GeneChip Mapping 250K Nsp (SNP)	4	0	0	0	0	0	0	0	0	1
499	other	2496	4	0	2922	1	NA	NA	Affymetrix GeneChip Mapping 250K Nsp (SNP)	4	0	0	0	0	1	0	0	0	1
500	control	1096	4	0	2678	0	NA	NA	Affymetrix GeneChip Mapping 250K Nsp (SNP)	4	0	0	0	0	1	0	1	0	1
501	other	5113	4	0	2922	1	NA	NA	Affymetrix GeneChip Mapping 250K Nsp (SNP)	4	0	0	1	1	1	0	0	1	1
502	control	2161	4	0	4505	0	NA	NA	Affymetrix GeneChip Mapping 250K Nsp (SNP)	4	0	1	0	0	1	0	0	0	0
503	case	3287	4	0	61	1	NA	NA	Affymetrix GeneChip Mapping 250K Nsp (SNP)	4	0	0	1	0	1	0	1	0	1
504	other	3652	4	0	3348	1	NA	NA	Affymetrix GeneChip Mapping 250K Nsp (SNP)	4	0	0	1	0	1	1	1	1	1
505	other	3105	4	0	761	1	NA	NA	Affymetrix GeneChip Mapping 250K Nsp (SNP)	4	0	0	0	0	0	0	0	0	1
506	control	639	4	0	4444	0	NA	NA	Affymetrix GeneChip Mapping 250K Nsp (SNP)	4	0	0	1	0	1	1	0	0	1
507	control	1918	4	1	1918	0	NA	NA	Affymetrix GeneChip Mapping 250K Nsp (SNP)	4	0	1	0	0	0	0	0	1	1
508	other	1461	4	0	1096	1	NA	NA	Affymetrix GeneChip Mapping 250K Nsp (SNP)	4	0	0	0	0	1	0	0	1	1
509	other	1461	4	0	2070	1	NA	NA	Affymetrix GeneChip Mapping 250K Nsp (SNP)	4	0	0	0	0	1	0	0	1	1
510	other	8035	4	0	2557	1	NA	NA	Affymetrix GeneChip Mapping 250K Nsp (SNP)	4	0	0	0	0	0	0	0	0	0
511	control	5296	4	0	3348	0	NA	NA	Affymetrix GeneChip Mapping 250K Nsp (SNP)	4	0	0	0	0	1	0	0	0	1
512	case	1735	4	0	30	1	NA	NA	Affymetrix GeneChip Mapping 250K Nsp (SNP)	4	0	0	1	0	1	0	1	1	1
513	case	822	4	0	274	1	NA	NA	Affymetrix GeneChip Mapping 250K Nsp (SNP)	4	0	0	0	0	0	0	0	1	1
514	other	1826	4	0	822	1	NA	NA	Affymetrix GeneChip Mapping 250K Nsp (SNP)	4	0	0	1	0	1	0	0	0	1
515	other	1491	4	0	1370	1	NA	NA	Affymetrix GeneChip Mapping 250K Nsp (SNP)	4	0	0	1	0	1	0	1	1	1
516	other	2922	4	0	730	1	NA	NA	Affymetrix GeneChip Mapping 250K Nsp (SNP)	4	0	0	0	0	0	0	0	0	1
517	control	2435	4	0	3135	0	NA	NA	Affymetrix GeneChip Mapping 250K Nsp (SNP)	4	0	0	0	1	1	0	0	1	1
518	case	609	4	0	274	1	NA	NA	Affymetrix GeneChip Mapping 250K Nsp (SNP)	4	0	0	0	0	0	0	1	1	1
519	other	730	4	0	1735	1	NA	NA	Affymetrix GeneChip Mapping 250K Nsp (SNP)	4	0	0	0	0	1	0	0	0	1
520	other	1552	4	0	700	1	NA	NA	Affymetrix GeneChip Mapping 250K Nsp (SNP)	4	0	0	1	0	1	0	0	1	1
521	other	578	4	0	578	1	NA	NA	Affymetrix GeneChip Mapping 250K Nsp (SNP)	4	0	0	0	0	0	0	0	0	0
522	other	3774	4	0	1978	1	NA	NA	Affymetrix GeneChip Mapping 250K Nsp (SNP)	4	0	0	1	1	1	0	1	0	1
523	other	2070	4	0	1096	1	NA	NA	Affymetrix GeneChip Mapping 250K Nsp (SNP)	4	0	0	0	0	0	0	0	0	1
524	other	3013	4	0	3196	1	NA	NA	Affymetrix GeneChip Mapping 250K Nsp (SNP)	4	0	0	0	0	0	0	1	0	0
525	case	1522	4	0	335	1	NA	NA	Affymetrix GeneChip Mapping 250K Nsp (SNP)	4	0	0	0	0	1	0	0	0	1
526	case	5174	4	0	426	1	NA	NA	Affymetrix GeneChip Mapping 250K Nsp (SNP)	4	0	0	0	0	0	0	1	0	1
527	other	4900	4	0	2709	1	NA	NA	Affymetrix GeneChip Mapping 250K Nsp (SNP)	4	0	1	0	0	1	1	1	0	1
528	case	913	4	1	457	1	NA	NA	Affymetrix GeneChip Mapping 250K Nsp (SNP)	4	0	1	0	0	0	0	1	0	1
529	control	548	4	1	4626	0	NA	NA	Affymetrix GeneChip Mapping 250K Nsp (SNP)	4	0	1	0	0	0	0	0	0	1
530	case	30	4	1	213	1	NA	NA	Affymetrix GeneChip Mapping 250K Nsp (SNP)	4	0	1	0	0	0	0	0	0	1
531	control	426	4	1	7092	0	NA	NA	Affymetrix GeneChip Mapping 250K Nsp (SNP)	4	0	1	0	0	0	0	0	1	1
532	case	274	4	1	396	1	NA	NA	Affymetrix GeneChip Mapping 250K Nsp (SNP)	4	0	1	0	0	0	0	0	0	1
533	other	2191	4	1	1065	1	NA	NA	Affymetrix GeneChip Mapping 250K Nsp (SNP)	4	0	1	0	0	0	0	0	1	1
534	case	822	4	1	243	1	NA	NA	Affymetrix GeneChip Mapping 250K Nsp (SNP)	4	0	1	0	0	0	0	0	0	1
535	case	670	4	1	30	1	NA	NA	Affymetrix GeneChip Mapping 250K Nsp (SNP)	4	0	1	0	0	0	0	1	1	1
536	case	274	4	1	30	1	NA	NA	Affymetrix GeneChip Mapping 250K Nsp (SNP)	4	0	1	0	0	0	0	0	0	1
537	other	883	4	1	2131	1	NA	NA	Affymetrix GeneChip Mapping 250K Nsp (SNP)	4	0	1	0	0	0	0	0	0	1
538	control	457	4	1	4018	0	NA	NA	Affymetrix GeneChip Mapping 250K Nsp (SNP)	4	0	1	0	0	0	0	0	0	1
539	other	1704	4	1	609	1	NA	NA	Affymetrix GeneChip Mapping 250K Nsp (SNP)	4	0	1	0	0	0	0	0	0	1
540	other	1674	4	1	883	1	NA	NA	Affymetrix GeneChip Mapping 250K Nsp (SNP)	4	0	0	0	0	0	0	0	1	1
541	case	1339	4	1	487	1	NA	NA	Affymetrix GeneChip Mapping 250K Nsp (SNP)	4	0	1	0	0	0	0	0	0	1
542	control	1613	4	1	4018	0	NA	NA	Affymetrix GeneChip Mapping 250K Nsp (SNP)	4	0	0	0	0	1	0	0	1	1
543	case	4018	4	1	213	1	NA	NA	Affymetrix GeneChip Mapping 250K Nsp (SNP)	4	0	0	0	0	0	0	0	0	1
544	case	1826	4	1	396	1	NA	NA	Affymetrix GeneChip Mapping 250K Nsp (SNP)	4	0	1	1	0	0	0	1	0	1
545	case	852	4	1	0	1	NA	NA	Affymetrix GeneChip Mapping 250K Nsp (SNP)	4	0	1	0	0	0	0	0	1	1
546	other	365	4	1	974	1	NA	NA	Affymetrix GeneChip Mapping 250K Nsp (SNP)	4	0	1	0	0	0	0	0	0	1
547	case	639	4	1	365	1	NA	NA	Affymetrix GeneChip Mapping 250K Nsp (SNP)	4	0	1	0	0	0	0	0	1	1
548	case	852	4	1	426	1	NA	NA	Affymetrix GeneChip Mapping 250K Nsp (SNP)	4	0	0	0	0	0	0	0	1	1
549	case	487	4	1	30	1	NA	NA	Affymetrix GeneChip Mapping 250K Nsp (SNP)	4	0	1	0	0	0	0	1	1	1
550	other	1644	4	1	791	1	NA	NA	Affymetrix GeneChip Mapping 250K Nsp (SNP)	4	0	1	0	0	0	0	0	0	1
551	other	578	4	1	548	1	NA	NA	Affymetrix GeneChip Mapping 250K Nsp (SNP)	4	0	1	0	0	0	0	1	1	1
552	case	1431	4	1	122	1	NA	NA	Affymetrix GeneChip Mapping 250K Nsp (SNP)	4	0	0	1	0	1	0	0	1	1
553	NA	335	4	1	NA	NA	NA	NA	Affymetrix GeneChip Mapping 250K Nsp (SNP)	4	0	1	0	0	0	0	0	0	1
554	other	304	4	1	1461	0	NA	NA	Affymetrix GeneChip Mapping 250K Nsp (SNP)	4	0	1	0	0	0	0	0	0	1
555	case	213	4	1	183	1	NA	NA	Affymetrix GeneChip Mapping 250K Nsp (SNP)	4	0	1	0	0	1	0	0	1	1
556	case	243	4	1	487	1	NA	NA	Affymetrix GeneChip Mapping 250K Nsp (SNP)	4	0	1	0	0	0	0	0	0	1
